# Supplementary material for: A&nbsp;24,482-bp Deletion Increases Seed Weight Through Multiple Pathways in Rapeseed (Brassica Napus L.)
Source: Research Square preprint supplement (doi:10.21203/rs.3.rs-189294/v1), 2021-02-12
Supplement: Supplementary file 1 [file 6e38e68e4092dee56cd045bc.docx]

Table S4 Primers used in the study

| Primer | Sequence | Function |
| --- | --- | --- |
| SCC9-005 | GCAGCAACTTGGTTTCAGGT  CAGCCCTTGGCTTAGACACT | Fine-mapping |
| SCC9-136 | CGTCAAGCCAATAGCAGAATCG  CTTGGTGGCGTGTTTCTTGTTC | Fine-mapping |
| SRC9-298X | AGCCCTTGTGATTATTGCGG  GTTCACCGCCACTTGTAGAA | Fine-mapping |
| XHSRC9-69 | AAGCCCATCCTTCCTCGCCT  TCCGTTCCTGCTCAGACCACCT | Fine-mapping |
| XHSRC9-52 | GGTTGGGGACCATTAGTAATCCCCTCT  TCGAGGCAGAACCATCGGGGT | Fine-mapping |
| STC9-164 | CAACCCTACAAAGATGAGCTAAGACG  TGGATGATGACTTTGCAGATGG | Fine-mapping, Haplotype |
| XH14 | CTCCATAGGTAAGGGCAGAGT  GAGATGAACTCCCAACAATTGCC | Fine-mapping, Haplotype |
| SRC9-397 | GGTTTTGGCACACGGATTAAAGAAACA  CGTGCTAAGCATGGGGTAATAACACT | Fine-mapping |
| XH190 | GGTTGCAATGGTACACTGGTTG  ACAGAGACAGATGCACCTGT | Amplify the deletion |
| M1 | CTCCATAGGTAAGGGTTCGATAC  GAGATGAACTCCCAACAATTGCC | Verify the deletion |
| M2 | CAACCAGTGTACCATTGCAACC  GATGGTCAAGGAGTCTTATCTG | Verify the deletion |
| M3 | GCTGAAGTGATCAGAGGTGATG  TCTCGTGGCTCTAGGCTTGAAC | Verify the deletion |
| M4 | CAACCCTACAAAGATGAGCTAAGACG  TGGATGATGACTTTGCAGATGG | Verify the deletion |
| M5 | CAGTGCCACCTTAAGCTAGACG  ACCACATGCGTATTCCTCCGTA | Verify the deletion |
| M6 | ACATCCTTCACCACTATGCGCA  CAGAGGAAGGTAACCTCCTATC | Verify the deletion |
| M7 | CTCCATAGGTAAGGGCAGAGT  GAGATGAACTCCCAACAATTGCC | Verify the deletion |
| M8 | ATCGTGTTGGCTGGAAGTCCAT  CCTTCAAGGACCGTTGTATCTC | Verify the deletion |
| M9 | ACAGAGACAGATGCACCTGT  GAGATCTCCGTAAGGAGCGA | Verify the deletion |
| qEOD3.A5 | TCTGAGCATCGTAGACAAAC  TCAAGCTCGTTCTGTACCGT | qPCR |
| qEOD3.C4 | CACAGCATCGTACTCAAACC  CAAGCTCATTTTGTACCGTC | qPCR |
| qKLU.A9 | GTCGGCAGCATAATTGAGAA  TGCAAGTACCCACTCCACTA | qPCR |
| qHPL1.C7 | GTCCAAGCTGCTGAATTATC  CAGCGTCGCCAGTAATTTTA | qPCR |
| qSUC2.A7 | CTGCTGGTGCCTTAACTCTA  CCACCACCGAAGATTTCATCA | qPCR |
| qSUC2.A9 | CTGCTGGTGCCTTAACTCTA  CCACCATGGAATAGTTCATCG | qPCR |
| qXXT4.C5 | CCAAACCGATTCTTGCCAAG  CCAGGGTTCTGATTTAGCCA | qPCR |
| qTPS10.C3 | TCCGTCTAGCCAATGACCTTGT  TGTCGTTGATCATCTTCTGC | qPCR |
| qSWEET13.A10C9 | TTACACTTAGCGCCGTCACA  TGTATCCGAAACTGGAGTGG | qPCR |
| qSWEET12.A6C8 | GTTTAATTCTCCTCCTCTGCC  AAGAGCAAACCCGATCACGTTG | qPCR |
| qJMT.C5 | TTCCTTGGTAGAAGCTCACC  CCCAGTCAACCGGAATTATC | qPCR |
| qIGMT5.A7 | CAAGTGTCAGATAGTAGACG  GCACAGTCCTCATCATTCCA | qPCR |
| qCYP90D1.A1C1 | CTCAAAGCTCAAGTTGTCAA  CTGGCAATGACATAAGCCCTT | qPCR |
| qCYP90D1.A5C5 | CTCAAAGCTCAAATCGTTAG  TTGGCAGTGACATGAGTCCTC | qPCR |
| qLPEAT1.A7 | AAGTGCCTTGGTTGCGTCTA  CCTATGAGCTTCTCTAACTC | qPCR |
| qACT2 | AGAGGTTCTGTTCCAGCCGT  TGCTCATACGGTCCGCAATA | qPCR |
